# Supplementary material for: USP20 mitigates doxorubicin-induced cardiotoxicity by deubiquitinating and stabilizing HuR
Source: Research Square preprint supplement (doi:10.21203/rs.3.rs-6151078/v1), 2025-04-16
Supplement: Supplementary file 1 [file 1bd7bb66984da883fe41f2aa.docx]

**USP20 mitigates doxorubicin-induced cardiotoxicity by deubiquitinating and stabilizing HuR**

***Supplementary Information***

Supplementary Information Contents:

Supplementary Tables S1–S4

Supplementary Figures S1–S7

**Supplementary Table S1**

Sequences of the primers used for real-time qPCR analysis

| Gene | Species | Sequence (Forwards) | Sequence (Reverse) |
| --- | --- | --- | --- |
| *USP2* | Rat | ACAACCTGTATGCTGTGTCCAATC | GTGTGCCATTCGCCCGTAAC |
| *USP10* | Rat | TTAACGGCTGGCTGCGAATTG | CGGCGGTAATACAGGAGGTAGG |
| *USPL1* | Rat | TACCAAGTCACCTCCGTCATACAG | TCATCACACTCCAGCCAACTCC |
| *USP20* | Rat | AGTTCCTACGCTGCCTGATGG | ACGCCTCTCATCTGTGTCACTG |
| *USP39* | Rat | TGACCTCATCGCCAACATTGTG | TTGTAGTTCATACCACTTGCCTGTC |
| *USP42* | Rat | ACCACTCATCCTGCCCATAGC | GCCGCCTGCTTGCTGTTG |
| HuR | Rat | GCATCACCAGGCACAGAGATTCAG | CACCAGCCCGAGGAAGCATTG |
| *GAPDH* | Rat | GACATGCCGCCTGGAGAAAC | AGCCCAGGATGCCCTTTAGT |
| *GPX4* | Rat | CCAGCAACAGCCACGAGTTCC | CACACGCAACCCCTGTACTTATCC |
| *GPX4* | Mouse | ATAAGAACGGCTGCGTGGTGAAG | TAGAGATAGCACGGCAGGTCCTTC |
| *GAPDH* | Mouse | GGTTGTCTCCTGCGACTTCA | TGGTCCAGGGTTTCTTACTCC |

**Supplementary Table S2**

Echocardiographic parameters in Dox-challenged mice

|  | Saline | | Dox | |
| --- | --- | --- | --- | --- |
|  | USP20fl/fl | USP20CKO | USP20fl/fl | USP20CKO |
|  | n=6 | n=6 | n=6 | n=6 |
| LVID; d (mm) | 1.58±0.21 | 1.69±0.41ns | 2.5+0.17*** | 3.16+0.24## |
| LVID; s (mm) | 2.83±0.11 | 2.94±0.67ns | 3.60±0.29* | 4.05±0.28NS |
| LVAW; d (mm) | 0.95±0.23 | 0.86±0.30ns | 1.05±0.26ns | 0.93±0.26NS |
| LVAW; s (mm) | 1.28±0.24 | 1.30±0.39ns | 1.38±0.28ns | 1.16±0.28NS |
| IVS; d (mm) | 0.65±0.19 | 0.72±0.27ns | 0.83±0.23ns | 0.74±0.16NS |
| IVS; s (mm) | 1.18±0.27 | 1.06±0.27ns | 1.24±0.32ns | 0.99±0.26NS |
| CO (mL/min) | 13.98±2.10 | 13.57±2.46ns | 10.23±1.04** | 7.00±0.98# |

Dox, doxorubicin; LVID, left ventricular internal diameter; LVAW, left ventricular anterior wall; IVS, interventricular septum; CO, cardiac output; d, diastole; s, systole. ns, p>0.05 vs. USP20fl/fl + saline; *, p<0.05 vs. USP20fl/fl + saline; **, p<0.01 vs. USP20fl/fl + saline; ***, p<0.001 vs. USP20fl/fl + saline; NS, p>0.05 vs. USP20fl/fl + Dox; #, p<0.05 vs. USP20fl/fl + Dox; ##, p<0.01 vs. USP20fl/fl + Dox.

**Supplementary Table S3**

Echocardiographic parameters in Dox-challenged HuRCKO mice treated with AAV9-cTnT-Flag-USP20oe

|  | Dox | |
| --- | --- | --- |
|  | HuRCKO | HuRCKO |
|  | AAV9-cTnT-Flag-EV | AAV9-cTnT-Flag-USP20oe |
|  | n=6 | n=6 |
| Diameter; d (mm) | 3.78±0.37 | 3.87±0.41NS |
| Diameter; s (mm) | 2.81±0.35 | 2.85±0.35NS |
| LVAW; d (mm) | 0.91±0.20 | 0.97±0.15NS |
| LVAW; s (mm) | 1.26±0.21 | 1.30±0.16NS |
| IVS; d (mm) | 0.78±0.06 | 0.81±0.07NS |
| IVS; s (mm) | 1.04±0.17 | 1.02±0.16NS |
| CO (mL/min) | 15.70±3.93 | 14.61±1.78NS |

Dox, doxorubicin; LVID, left ventricular internal diameter; LVAW, left ventricular anterior wall; IVS, interventricular septum; CO, cardiac output; d, diastole; s, systole. NS, p>0.05 vs. HuRCKO + AAV9-cTnT-Flag-EV + Dox.

**Supplementary Table S4**

Echocardiographic parameters in Dox-challenged mice treated with AAV9, which specifically overexpressed the target gene in cardiomyocytes (empty vector, cTnT-USP20)

|  | Saline | Dox | |
| --- | --- | --- | --- |
|  | WT | WT | WT |
|  | AAV9-cTnT-Flag-EV | AAV9-cTnT-Flag-EV | AAV9-cTnT-Flag-USP20 |
|  | n=6 | n=6 | n=6 |
| Diameter; d (mm) | 3.18±0.29 | 3.36±0.56* | 2.74±0.44# |
| Diameter; s (mm) | 1.83±0.28 | 2.38±0.43* | 1.77±0.30# |
| LVAW; d (mm) | 1.10±0.18 | 0.98±0.25ns | 1.20±0.25NS |
| LVAW; s (mm) | 1.56±0.16 | 1.18±0.41ns | 1.52±0.26NS |
| IVS; d (mm) | 0.74±0.10 | 0.83±0.19ns | 0.98±0.17NS |
| IVS; s (mm) | 1.29±0.18 | 1.18±0.28ns | 1.27±0.18NS |
| CO (mL/min) | 12.24±2.27 | 6.67±1.74*** | 11.01±1.68# |

Dox, doxorubicin; EV, empty vector; LVID, left ventricular internal diameter; LVAW, left ventricular anterior wall; IVS, interventricular septum; CO, cardiac output; d, diastole; s, systole. ns, p>0.05 vs. WT + AAV9-cTnT-Flag-EV + saline; *, p<0.05 vs. WT + AAV9-cTnT-Flag-EV + saline; ***, p<0.001 vs. WT + AAV9-cTnT-Flag-EV + saline; NS, p>0.05 vs. WT + AAV9-cTnT-Flag-EV + Dox; #, p<0.05 vs. WT + AAV9-cTnT-Flag-EV + Dox.

**Supplementary Figure 1**

(A) Constructed myocardium-specific USP20 knockout mice.

(B–C) PCR experiments were conducted with USP20-WT and USP20-KO primers and DNA samples extracted from mouse tails (B). The identification results (C).

(D) Representative immunoblots of USP20 expression in different organs.

**Supplementary Figure 2**

(A–B) Representative immunoblots of neonatal rat primary cardiomyocytes (NRPCs) transfected with si-USP20 (A) and the statistical results (B) (n=3).

(C–D) Representative immunoblots of NRPCs transfected with a USP20 overexpression plasmid (C) and the statistical results (D) (n=3).

Significance is defined as *P < 0.05, **P < 0.01, and ***P < 0.001. The abbreviation “ns” denotes no statistical significance.

**Supplementary Figure 3**

1. Representative western blot analysis of Flag expression in heart tissues, with GAPDH used as a loading control.

**Supplementary Figure 4**

(A) NIH/3T3 cells harbouring the empty lentiviral vector or USP20-gRNA, with one distinct sequence transduced, followed by the selection of stable monoclonal cell lines with an antibiotic. The protein expression of USP20 in the aforementioned NIH/3T3 cell lines was assessed via western blot analysis.

**Supplementary Figure 5**

(A–D) Ferrous ion (Fe2+) (A), superoxide dismutase (SOD) (B), malondialdehyde (MDA) (C) and glutathione (GSH) (D) levels in HL-1 cells from each group (n=3).

(E–F) Representative western blot analysis of GPX4 and Flag expression in HL-1 cells. GAPDH was used as a loading control (E), and the statistical results are shown (F) (n=3).

Significance is defined as *P < 0.05, **P < 0.01, and ***P < 0.001. The abbreviation “ns” denotes no statistical significance.

**Supplementary Figure 6**

(A–B) Representative immunoblots of neonatal rat primary cardiomyocytes (NRCMs) transfected with si-HuR (A) and statistical results (B) (n=3).

(C–D) Cell Counting Kit-8 (CCK-8) results (C) and lactate dehydrogenase (LDH) levels (D) in the serum from each group (n = 3).

Significance is defined as *P < 0.05, **P < 0.01, and ***P < 0.001. The abbreviation “ns” denotes no statistical significance.

**Supplementary Figure 7**

1. Relative GPX4 mRNA levels in NRCMs transfected with the HuR overexpression plasmid, stimulated with Dox and then treated with Act D (n=3).
2. RNA-binding protein immunoprecipitation assays were used to verify the binding of HuR to GPX4 (n=3).

Significance is defined as *P < 0.05, **P < 0.01, and ***P < 0.001. The abbreviation “ns” denotes no statistical significance.
